# Supplementary material
Source: PubMed Central journal article supplement (PMC6724187)
Supplement: jama-322-1271-s001.pdf [file jama-322-1271-s001.pdf]

## Supplementary Online Content 1

Aminian A, Zajichek A, Arterburn DE, et al. Association of metabolic surgery with major adverse cardiovascular outcomes in patients with type 2 diabetes and obesity. *JAMA*. doi:10.1001/jama.2019.14231

|                                                                                                                                                                                                                                                                                                |    |
|------------------------------------------------------------------------------------------------------------------------------------------------------------------------------------------------------------------------------------------------------------------------------------------------|----|
| <b>eTable 1.</b> Diagnosis and Procedure Codes.....                                                                                                                                                                                                                                            | 2  |
| <b>eTable 2.</b> Diagnosis and Intervention Codes for Adverse Events of Metabolic Surgery.....                                                                                                                                                                                                 | 3  |
| <b>eTable 3.</b> Class of Diabetes Medications at the Index Date.....                                                                                                                                                                                                                          | 5  |
| <b>eTable 4.</b> Cause-Specific Event Rates (%) per 100 Patient-Years of Follow-up at 8 Years, for Each Study Outcome Stratified by Surgical and Non-surgical Patients.....                                                                                                                    | 6  |
| <b>eTable 5</b> Cumulative Incidence Estimates (%) and 95% Confidence Intervals at 2, 5, and 8 Years After the Index Date for Each Study Outcome Stratified by Surgical and Non-surgical Patients.....                                                                                         | 7  |
| <b>eFigure 1.</b> Association of Metabolic Surgery Compared With Usual Care for the Primary Composite Endpoint in Key Subgroups in the Fully-Adjusted Cox Models.....                                                                                                                          | 8  |
| <b>eTable 6</b> Hazard Ratios (95% CIs) and P Values From Cox Models Comparing the Relative Instantaneous Risk of Each Outcome for Surgical Vs. Non-surgical Patients.....                                                                                                                     | 9  |
| <b>eTable 7.</b> Time-Varying Hazard Ratios and 95% CIs at 2, 5, and 8 Years After the Index Date Comparing Surgical and Non-surgical Patients From a Fully-Adjusted Cox Model for Each Outcome.....                                                                                           | 10 |
| <b>eFigure 2.</b> Mean Trend Curve of HbA1c (%) and Proportions of Patients Taking Non-insulin Diabetes Drugs Over Four Years of Follow-up Categorized by the Treatment Group (Metabolic Surgery Vs. Usual Care) and the BMI ( $\geq 35$ vs. $< 35$ kg/m <sup>2</sup> ) at the Index Date..... | 11 |
| <b>eTable 8.</b> Average Change in Metabolic and Nutritional Variables From Baseline and in Proportions of Patients Taking Diabetes and Cardiovascular Medications (%) at 1, 2, 5, and 8 Years of Follow-up in Surgical vs. Non-surgical Patients.....                                         | 12 |
| <b>eTable 9.</b> Total Number of Observations and Number of Distinct Patients With Available Measurements After Each Time-Point Following the Index Date for Metabolic and Nutritional Values by Treatment.....                                                                                | 13 |
| <b>eTable 10.</b> Sample Size for Computing Proportions of Patients Taking Diabetes and Cardiovascular Drugs Over Time at 0, 1, 2, 5, and 8 Years After the Index Date by Treatment Group.....                                                                                                 | 14 |
| <b>eTable 11.</b> Cumulative Incidence Estimates (%) and 95% CIs for Interventions at 1, 2, 5, and 8 Years After Metabolic Surgery.....                                                                                                                                                        | 15 |
| <b>eFigure 3.</b> Mean Trend Curve of Nutritional Variables of Interest Over Eight Years of Follow-Up in the Surgical and Non-surgical Patients.....                                                                                                                                           | 16 |
| <b>Sensitivity Analyses</b> .....                                                                                                                                                                                                                                                              | 17 |
| <b>Matching and Index Date Sampling</b> .....                                                                                                                                                                                                                                                  | 17 |
| <b>eFigure 4.</b> Hazard Ratios and 95% Confidence Intervals for Metabolic Surgery Versus No Surgery From Fully-Adjusted Cox Models for Each Outcome for Five (5) Iterations of Index Date Random Sampling and Three (3) Different Matching Ratios (Total of 15 Datasets).....                 | 18 |
| <b>Time-Varying Hazard Ratios</b> .....                                                                                                                                                                                                                                                        | 19 |
| <b>E-Value</b> .....                                                                                                                                                                                                                                                                           | 19 |
| <b>eTable 12.</b> E-Value for the Effect of Metabolic Surgery on Each Outcome (and its Upper Limit of 95% CI) in Fully-Adjusted Cox Models.....                                                                                                                                                | 20 |

This supplementary material as been provided by the authors to give readers additional information about their work.

**eTable 1. Diagnosis and Procedure Codes**

|                                                               |                                                                                                                                                                                                                                                                                                                                                                                                                 |
|---------------------------------------------------------------|-----------------------------------------------------------------------------------------------------------------------------------------------------------------------------------------------------------------------------------------------------------------------------------------------------------------------------------------------------------------------------------------------------------------|
| Atrial fibrillation                                           | ICD9: 427.31<br>ICD10: i48.0, i48.1, i48.2, i48.91<br>CPT: 93650, 93653, 93656, 93657                                                                                                                                                                                                                                                                                                                           |
| Bariatric surgery                                             | CPT-4: 43633, 43634, 43770, 43775, 43644, 43645, 43659, 43842, 43843, 43844, 43845, 43846, 43847<br>ICD9: 44.31, 43.82, 44.95, 43.89, 44.38, 44.39, 44.68<br>HCPCS: S2082, S2085                                                                                                                                                                                                                                |
| Cancer                                                        | ICD9: 140.XX-172.XX, 174.XX-209.XX<br>ICD10: C00.XX-C43.XX, C45.XX-C96.XX, D03.XX, D3A.XX, D45.XX                                                                                                                                                                                                                                                                                                               |
| Cerebrovascular event                                         | ICD9 (diagnoses): 433.X1, 434.X1, 436.0, 430.X, 431.X<br>ICD9 (procedure): 38.12, 0.61, 0.63<br>CPT-4: 37215, 37216, 0075T, 0076T, 35301, 37205, 37206                                                                                                                                                                                                                                                          |
| COPD                                                          | ICD9: 491.0, 491.1, 491.2X, 491.8, 491.9, 492.0, 492.8, 496                                                                                                                                                                                                                                                                                                                                                     |
| Coronary artery disease                                       | ICD9 (diagnoses): 410.X, <b>411.X</b> , 411.X AND <b>414.X</b><br>ICD9 (procedure): 36.01, 36.02, 36.03, 36.05, 36.06, 36.07, 36.10, 36.11, 36.12, 36.13, 36.14, 36.15, 36.16, 36.17, 36.19, 36.31, 36.32, 36.33, 36.64<br>CPT-4: 92982, 92984, 92995, 92996, 92980, 92981, 33510, 33511, 33512, 33513, 33514, 33516, 33517, 33518, 33519, 33521, 33522, 33523, 33530, 33533, 33534, 33535, 33536, 93539, 93540 |
| Diabetic neuropathy                                           | ICD9: 250.6, 357.2                                                                                                                                                                                                                                                                                                                                                                                              |
| Dyslipidemia                                                  | ICD9: 272.0, 272.1, 272.2, 272.3, 272.4                                                                                                                                                                                                                                                                                                                                                                         |
| GI Cancer                                                     | ICD9: 150.X, 151.X, 152.X, 157.X, 199.X, <b>531.X, 532.X, 533.X</b>                                                                                                                                                                                                                                                                                                                                             |
| Heart failure                                                 | ICD9: 428.0, 428.1, 428.20, 428.21, 428.22, 428.23, 428.30, 428.31, 428.32, 428.33, 428.40, 428.41, 428.42, 428.43, 428.9                                                                                                                                                                                                                                                                                       |
| Hypertension                                                  | ICD9: 401.X, 402.X, 403.X, 404.X, 405.X                                                                                                                                                                                                                                                                                                                                                                         |
| Ischemic stroke                                               | ICD-9: 433.X1, 434.X1<br>ICD-10: i63.X and i63.XX and i63.XXX                                                                                                                                                                                                                                                                                                                                                   |
| Liver, lung, heart transplant                                 | ICD9: V42.1, V42.6, V42.7, V42.83, V42.84                                                                                                                                                                                                                                                                                                                                                                       |
| Myocardial infarction                                         | ICD-9: 410.X, 410.XX<br>ICD-10: i21.X and i21.XX, i22.X and i22.XX, i23.X and i23.XX                                                                                                                                                                                                                                                                                                                            |
| Nephropathy                                                   | >= two (2) measures of eGFR less than 60 mL/min separated by at least 90 days without any intervening values >= 60 mL/min. The eGFR is approximated using MDRD equation.                                                                                                                                                                                                                                        |
| Peripheral arterial disease                                   | ICD9: 440.20, 440.21, 440.22, 440.23, 440.24, 440.29, 440.31, 440.32, 443.81, 443.89, 443.9, 447.1, 249.7, 250.7                                                                                                                                                                                                                                                                                                |
| * <b>Bolded text</b> indicates it must be a primary diagnosis |                                                                                                                                                                                                                                                                                                                                                                                                                 |

**eTable 2. Diagnosis and Intervention Codes for Adverse Events of Metabolic Surgery\***

| <b>Diagnosis Codes</b>                                               |                                                                                                                                                                                                                                                                                                                                                                                                                                                                                                                                                                                                                                                                                                                                                                                                                  |
|----------------------------------------------------------------------|------------------------------------------------------------------------------------------------------------------------------------------------------------------------------------------------------------------------------------------------------------------------------------------------------------------------------------------------------------------------------------------------------------------------------------------------------------------------------------------------------------------------------------------------------------------------------------------------------------------------------------------------------------------------------------------------------------------------------------------------------------------------------------------------------------------|
| Acute pulmonary complications                                        | Diagnostic code 518.51, 518.81, 997.39. Or, procedure code for intubation (96.04), tracheostomy (31.1, 31.29), or mechanical ventilation (31.74, 93.7, 93.9, 96.7, 96.71, 96.72).                                                                                                                                                                                                                                                                                                                                                                                                                                                                                                                                                                                                                                |
| Acute renal failure requiring dialysis                               | Diagnostic code for acute renal failure (584.9, 586, 997.5, V56.0, V56.1) when combined with a procedure code for hemodialysis (38.95, 39.95, 54.98).                                                                                                                                                                                                                                                                                                                                                                                                                                                                                                                                                                                                                                                            |
| Venous thromboembolism (deep vein thrombosis and pulmonary embolism) | Diagnostic codes for deep vein thrombosis (451.2, 451.81, 451.83, 451.84, 451.89, 451.9, 453.4, 453.40, 453.41, 453.42, 453.8, 671.30 to 671.35, 671.40, 671.42, 671.43, 671.90 to 671.94).<br>Diagnostic codes for pulmonary embolism (415.1, 416.2, 453.1, 453.2, 453.9, 639.6, 673.2).<br>Procedure code for pulmonary embolism (36013, 36014, 36015, 37191).                                                                                                                                                                                                                                                                                                                                                                                                                                                 |
| Transfusion                                                          | Extracted from Cleveland Clinic blood datamart with appropriate identification codes                                                                                                                                                                                                                                                                                                                                                                                                                                                                                                                                                                                                                                                                                                                             |
| <b>Intervention and Procedure Codes</b>                              |                                                                                                                                                                                                                                                                                                                                                                                                                                                                                                                                                                                                                                                                                                                                                                                                                  |
| Total parenteral nutrition                                           | ICD-9 procedure code 99.15                                                                                                                                                                                                                                                                                                                                                                                                                                                                                                                                                                                                                                                                                                                                                                                       |
| Endoscopic intervention                                              | 43200-04, 43215-28, 43232-36, 43239, 43243, 43245-51, 43255-58, 43450, 43453, 43456, 43458, 44360, 44361, 44376.<br>42.21-42.29, 44.22, 44.43, 45.11-45.14                                                                                                                                                                                                                                                                                                                                                                                                                                                                                                                                                                                                                                                       |
| Interventional radiology                                             | 36000, 36556, 36558, 36561, 36563, 36565, 36566, 36569, 36571-36590                                                                                                                                                                                                                                                                                                                                                                                                                                                                                                                                                                                                                                                                                                                                              |
| Cholecystectomy                                                      | 47490, 47562-47564, 47600-47610                                                                                                                                                                                                                                                                                                                                                                                                                                                                                                                                                                                                                                                                                                                                                                                  |
| Repair of abdominal wall hernia                                      | 44050, 49560-49572, 49585-49590, 49650-49659, 49900, 43659, S2075, S2077<br>53.1x-53.8x                                                                                                                                                                                                                                                                                                                                                                                                                                                                                                                                                                                                                                                                                                                          |
| Abdominal surgical procedure                                         | Diagnostic laparoscopy (ICD-9 54.21) and exploratory laparotomy (54.11)<br><br>Lysis of adhesions: ICD-9 54.51, 54.59<br><br>Repair of internal hernia: ICD-9 53.9<br><br>RYGB, AGB, sleeve and VGB:<br>ICD-9: 43.82, 43.89, 44.31, 44.38, 44.39, 44.68, 44.95<br>CPT-4: 43633, 43644, 43645, 43770, 43773, 43775, 43776, 43842, 43843, 43844, 43846, 43847, 43848, 43888, S2082, S2085<br><br>Duodenal switch: ICD-9: 43.7, 45.51, 45.91<br><br>Revision GJ: CPT-4: 43860, 43865<br><br>Additional revisional bariatric procedures:<br>ICD-9: 44.0 to 44.03, 44.89, 45.28, 45.29, 45.51, 46.01 to 46.03, 46.2, 46.64, 54.5, 54.75, 54.95<br>CPT-4: 43610, 44850<br><br>Percutaneous/laparoscopic:<br>ICD-9: 39.41, 39.98, 46.71, 46.73, 46.75, 46.94, 50.61, 54.0, 54.12, 54.19, 54.20, 54.22-.29, 54.91, 54.92 |

|                                                                                                                                                                                                                                                                                                                                                                                                                                                                                                                                                                                      |                                                                                                                                                                                                                                                                                                                                                                                                                                                                                                                                                                                                                                                                                                                                                                                                                                                                                                      |
|--------------------------------------------------------------------------------------------------------------------------------------------------------------------------------------------------------------------------------------------------------------------------------------------------------------------------------------------------------------------------------------------------------------------------------------------------------------------------------------------------------------------------------------------------------------------------------------|------------------------------------------------------------------------------------------------------------------------------------------------------------------------------------------------------------------------------------------------------------------------------------------------------------------------------------------------------------------------------------------------------------------------------------------------------------------------------------------------------------------------------------------------------------------------------------------------------------------------------------------------------------------------------------------------------------------------------------------------------------------------------------------------------------------------------------------------------------------------------------------------------|
|                                                                                                                                                                                                                                                                                                                                                                                                                                                                                                                                                                                      | <p>CPT-4: 43653, 44180, 44186, 44200,44202, 44203, 44238, 49000, 49002, 49010, 49020, 49021, 49040, 49041, 49060, 49061, 49320, 49322, 49323, 49329</p> <p>Abscess: CPT-4: 49020,49406</p> <p>Reoperation ulcers: CPT-4: 43840, 44180, 44602, 49905</p> <p>PEG tube/revision NOS/VGB: CPT-4: 43750, 43760, 43761, 43848, 43860, 44373</p> <p>Other procedures:<br/> ICD-9: 42.81, 42.84, 42.9, 42.92, 43.0, 43.11, 43.19, 43.42, 43.5, 43.7, 43.99, 44.13, 44.29, 44.49, 44.5, 44.62, 44.63, 44.99, 45.02, 45.19, 45.61, 45.62, 45.91, 46.39, 46.62, 46.71, 46.73, 46.75, 46.79, 46.81, 46.82, 46.85, 46.93, 46.99<br/> CPT-4: 10022, 10030, 10160, 43300, 43305, 43310, 43312, 43500, 43631, 43752, 43832, 43840, 43845, 43850, 43870, 43880, 43999, 44005, 44021, 44055, 44120, 44121, 44125, 44130, 44500, 44602, 44620, 44799, 48000, 49080, 49407, 49440, 49441, 49446, 49451, 49460, 49999</p> |
| <p>* ICD-9 and CPT-4 diagnosis and procedure codes were adapted and modified from:</p> <ul style="list-style-type: none"> <li>• Li RA, Liu L, Arterburn D, et al. Five-year Longitudinal Cohort Study of Reinterventions After Sleeve Gastrectomy and Roux-en-Y Gastric Bypass. <i>Ann Surg.</i> 2019 Jun 7. doi:10.1097/SLA.0000000000003401.</li> <li>• Flum D, Belle S, King W, et al. Longitudinal Assessment of Bariatric Surgery (LABS) Consortium. Perioperative safety in the Longitudinal Assessment of bariatric Surgery. <i>N Engl J Med.</i> 2009;361:445-54.</li> </ul> |                                                                                                                                                                                                                                                                                                                                                                                                                                                                                                                                                                                                                                                                                                                                                                                                                                                                                                      |

**eTable 3. Class of Diabetes Medications at the Index Date**

| <b>Diabetes Medications</b>  | <b>Metabolic Surgery<br/>(N=2287)</b> | <b>Matched Nonsurgical<br/>(N=11435)</b> |
|------------------------------|---------------------------------------|------------------------------------------|
| Alpha-glucosidase Inhibitors | 6 (0.3%)                              | 26 (0.2%)                                |
| Amylin Analog                | 7 (0.3%)                              | 27 (0.2%)                                |
| Biguanides                   | 1530 (67.9%)                          | 7606 (66.5%)                             |
| Bile Acid Sequestrants       | 8 (0.3%)                              | 55 (0.5%)                                |
| Dopamine Receptor Agonists   | 3 (0.1%)                              | 14 (0.1%)                                |
| DPP-4 Inhibitors             | 214 (9.4%)                            | 1202 (10.5%)                             |
| GLP-1 Receptor Agonists      | 270 (11.8%)                           | 841 (7.4%)                               |
| Insulins                     | 776 (33.9%)                           | 3806 (33.3%)                             |
| Meglitinides                 | 20 (0.9%)                             | 79 (0.7%)                                |
| Sulfonylureas                | 509 (22.3%)                           | 3404 (29.8%)                             |
| SGLT2 Inhibitors             | 43 (1.9%)                             | 143 (1.3%)                               |
| Thiazolidinediones           | 286 (12.5%)                           | 1083 (9.5%)                              |

**eTable 4. Cause-Specific Event Rates (%) per 100 Patient-Years of Follow-up at 8 Years, for Each Study Outcome Stratified by Surgical and Non-surgical Patients**

|                                | Rate per 100 patient-years <sup>a</sup> |                   | Difference in event rate per 100 patient-years |                                      |
|--------------------------------|-----------------------------------------|-------------------|------------------------------------------------|--------------------------------------|
|                                | Surgical Group                          | Nonsurgical Group | Estimate                                       | 95% Confidence Interval <sup>b</sup> |
| <b>Primary composite</b>       | 4.51                                    | 7.45              | 2.94                                           | (2.42, 3.48)                         |
| <b>Secondary composite</b>     | 2.11                                    | 3.64              | 1.53                                           | (1.18, 1.87)                         |
| <b>All-cause mortality</b>     | 1.19                                    | 2.22              | 1.03                                           | (0.76, 1.29)                         |
| <b>Heart failure</b>           | 0.92 (1.84)                             | 2.49 (3.7)        | 1.57                                           | (1.32, 1.82)                         |
| <b>Coronary artery disease</b> | 1.03 (1.98)                             | 1.55 (3.36)       | 0.52                                           | (0.29, 0.77)                         |
| <b>Cerebrovascular disease</b> | 0.45 (1.55)                             | 0.73 (2.74)       | 0.28                                           | (0.12, 0.43)                         |
| <b>Nephropathy</b>             | 0.89 (1.77)                             | 2.07 (3.47)       | 1.18                                           | (0.93, 1.42)                         |
| <b>Atrial fibrillation</b>     | 1.14 (2.16)                             | 1.77 (3.42)       | 0.63                                           | (0.36, 0.88)                         |

<sup>a</sup>The composite rates of death with each individual outcome are also shown in parentheses.  
<sup>b</sup> 95% bootstrap CI's (1000 samples) for the difference in 8-year event rate per 100 patient-years (nonsurgical control group – metabolic surgery) for each outcome and treatment group.

**eTable 5. Cumulative Incidence Estimates (%) and 95% Confidence Intervals at 2, 5, and 8 Years After the Index Date for Each Study Outcome Stratified by Surgical and Non-surgical Patients**

| Cumulative incidence estimates (%) and 95% confidence intervals |                  |                     |                     |                     |                   |                     |
|-----------------------------------------------------------------|------------------|---------------------|---------------------|---------------------|-------------------|---------------------|
|                                                                 | Year 2           |                     | Year 5              |                     | Year 8            |                     |
|                                                                 | Surgical Group   | Nonsurgical Group   | Surgical Group      | Nonsurgical Group   | Surgical Group    | Nonsurgical Group   |
| <b>Primary composite</b>                                        | 7.6<br>(6.4,8.8) | 12.2<br>(11.5,12.8) | 17.7<br>(15.6,19.7) | 30.4<br>(29.4,31.5) | 30.8<br>(27.6,34) | 47.7<br>(46.1,49.2) |
| <b>Secondary composite</b>                                      | 3.3<br>(2.5,4.1) | 5.5<br>(5.1,6.0)    | 8.8<br>(7.2,10.4)   | 15.5<br>(14.7,16.4) | 17<br>(14.3,19.7) | 27.6<br>(26.2,29.0) |
| <b>All-cause mortality</b>                                      | 1.8<br>(1.2,2.4) | 3.2<br>(2.8,3.5)    | 4.9<br>(3.7,6.1)    | 10.1<br>(9.4,10.8)  | 10<br>(7.8,12.2)  | 17.8<br>(16.6,19.0) |
| <b>Heart failure</b>                                            | 1.5<br>(1.0,2.1) | 4.2<br>(3.8,4.6)    | 3.8<br>(2.6,4.9)    | 10.4<br>(9.7,11.2)  | 6.8<br>(4.9,8.6)  | 18.9<br>(17.6,20.2) |
| <b>Coronary artery disease</b>                                  | 1.7<br>(1.1,2.3) | 2.9<br>(2.6,3.3)    | 4.2<br>(3.1,5.3)    | 6.8<br>(6.2,7.4)    | 7.9<br>(5.9,9.8)  | 11.6<br>(10.5,12.6) |
| <b>Cerebrovascular disease</b>                                  | 0.7<br>(0.3,1.1) | 1.3<br>(1.1,1.5)    | 2.2<br>(1.4,3.0)    | 3.1<br>(2.7,3.5)    | 4.1<br>(2.7,5.5)  | 5.6<br>(4.9,6.3)    |
| <b>Nephropathy</b>                                              | 1.4<br>(0.8,2.0) | 2.3<br>(2.0,2.7)    | 3.9<br>(2.8,5.1)    | 8.8<br>(8.0,9.5)    | 6.1<br>(4.4,7.8)  | 16.3<br>(15.0,17.6) |
| <b>Atrial fibrillation</b>                                      | 2.3<br>(1.6,3.1) | 2.7<br>(2.4,3.0)    | 4.8<br>(3.6,6.0)    | 7.6<br>(7.0,8.2)    | 7.9<br>(6.1,9.7)  | 13.6<br>(12.5,14.7) |

**eFigure 1. Association of Metabolic Surgery Compared With Usual Care for the Primary Composite Endpoint in Key Subgroups in the Fully-Adjusted Cox Models**

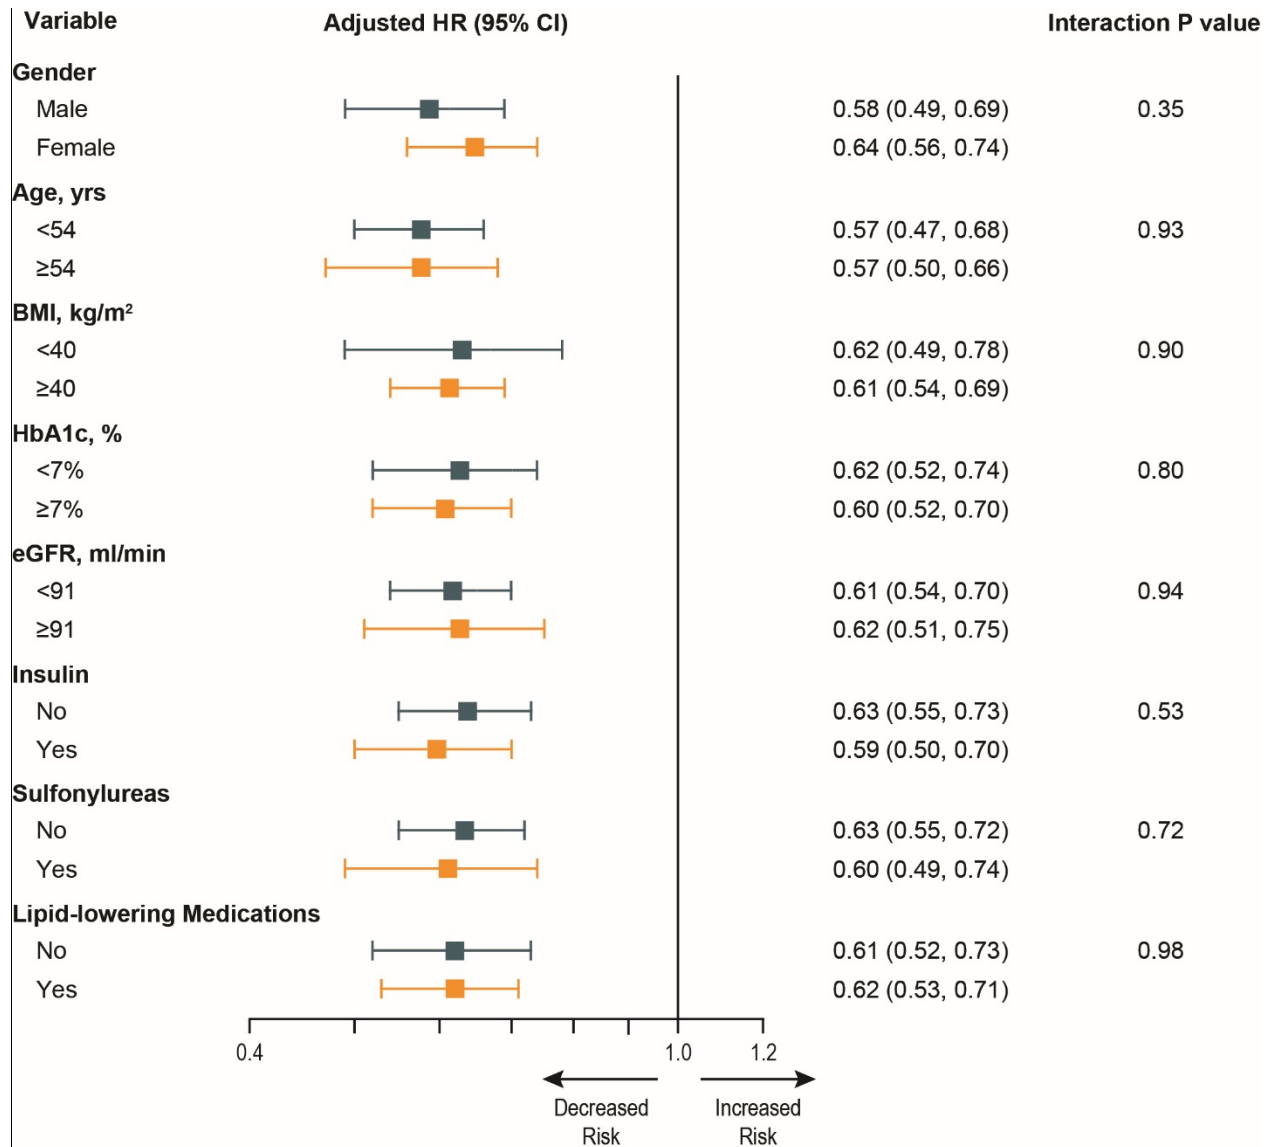

Adjusted hazard ratios were obtained after individually removing the original variable from the fully-adjusted Cox model and replacing it with the dichotomous sub-group variable as well as its interaction with the treatment variable. For example, the continuous BMI covariate was replaced by the dichotomous version and its interaction with the treatment. P-values for the interaction between each variable and the surgical indicator from the fully-adjusted model are also displayed. Age and eGFR were categorized based on their median values. The figure would indicate that the results were consistent across key subgroups.



**eTable 6. Hazard Ratio's (95% CIs) and P Values From Cox Models Comparing the Relative Instantaneous Risk of Each Outcome for Surgical Vs. Non-surgical Patients**

| <b>Outcome</b>          | <b>HR (95% CI)</b> | <b>P-value</b> | <b>PH P-value*</b> |
|-------------------------|--------------------|----------------|--------------------|
| Primary composite       | 0.61 (0.55, 0.69)  | <0.001         | 0.89               |
| Secondary composite     | 0.62 (0.53, 0.72)  | <0.001         | 0.76               |
| All-cause mortality     | 0.59 (0.48, 0.72)  | <0.001         | 0.63               |
| Heart failure           | 0.38 (0.30, 0.49)  | <0.001         | 0.65               |
| Coronary artery disease | 0.69 (0.54, 0.87)  | 0.002          | 0.24               |
| Cerebrovascular disease | 0.67 (0.48, 0.94)  | 0.02           | 0.10               |
| Nephropathy             | 0.40 (0.31, 0.52)  | <0.001         | 0.46               |
| Atrial fibrillation     | 0.78 (0.62, 0.97)  | 0.03           | 0.04               |

\* P-values testing the proportion-hazards assumption for each outcome.

**eTable 7. Time-Varying Hazard Ratios and 95% CIs at 2, 5, and 8 Years After the Index Date Comparing Surgical and Non-surgical Patients From a Fully-Adjusted Cox Model for Each Outcome**

| Outcome                 | Years since index date |                   |                   |
|-------------------------|------------------------|-------------------|-------------------|
|                         | 2                      | 5                 | 8                 |
| Primary                 | 0.57 (0.49, 0.65)      | 0.78 (0.66, 0.93) | 0.79 (0.64, 0.97) |
| Secondary               | 0.51 (0.42, 0.63)      | 0.82 (0.65, 1.04) | 0.73 (0.56, 0.95) |
| All-cause mortality     | 0.43 (0.33, 0.57)      | 0.69 (0.50, 0.95) | 0.80 (0.56, 1.15) |
| Heart failure           | 0.31 (0.23, 0.41)      | 0.40 (0.31, 0.53) | 0.52 (0.35, 0.79) |
| Coronary artery disease | 0.52 (0.38, 0.69)      | 1.03 (0.71, 1.51) | 0.99 (0.64, 1.51) |
| Cerebrovascular disease | 0.68 (0.45, 1.04)      | 1.29 (0.77, 2.15) | 0.60 (0.28, 1.25) |
| Nephropathy             | 0.41 (0.30, 0.58)      | 0.40 (0.26, 0.61) | 0.46 (0.30, 0.70) |
| Atrial fibrillation     | 0.68 (0.52, 0.89)      | 0.88 (0.62, 1.25) | 0.65 (0.42, 1.00) |

The treatment term in the fully-adjusted Cox models above were replaced with a restricted cubic-spline on the observed follow-up time interacted with the treatment group.

**eFigure 2. Mean Trend Curve of HbA1c (%) and Proportions of Patients Taking Non-insulin Diabetes Drugs Over Four Years of Follow-up Categorized by the Treatment Group (Metabolic Surgery Vs. Usual Care) and the BMI ( $\geq 35$  vs.  $< 35$  kg/m<sup>2</sup>) at the Index Date**

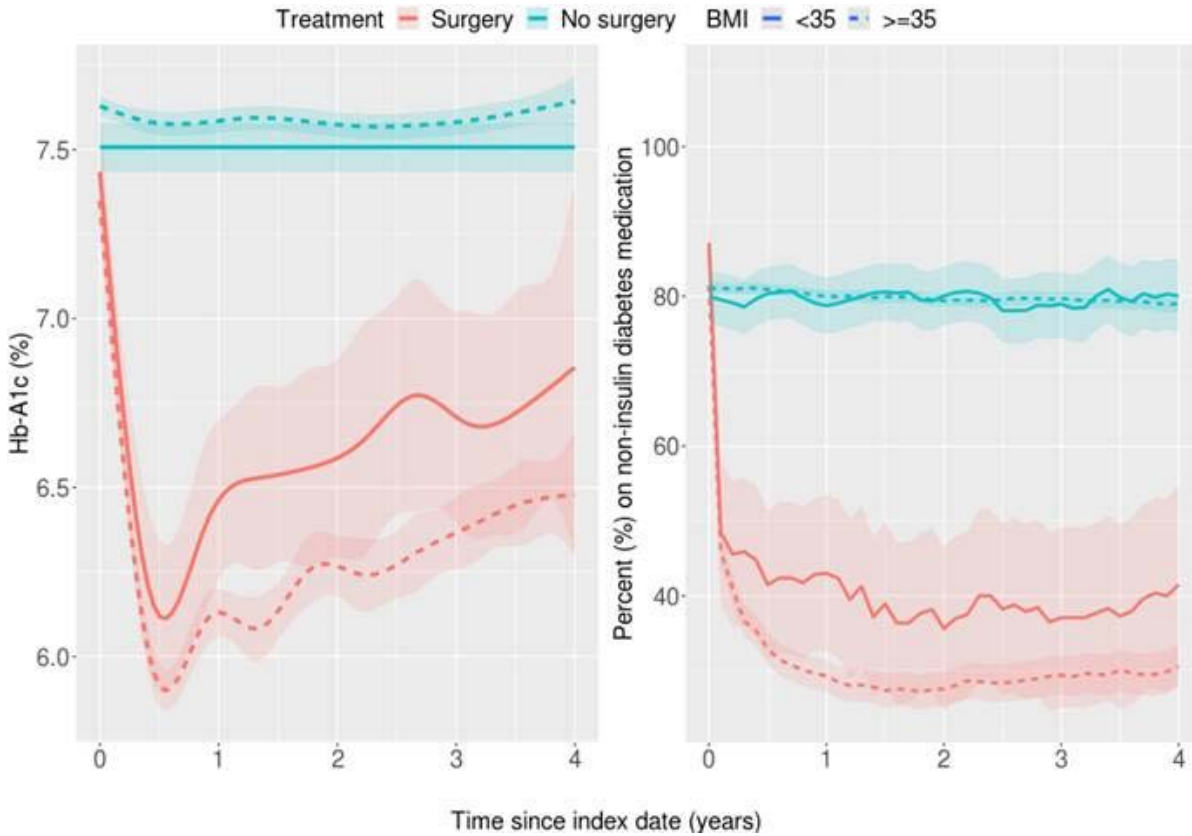

**eTable 8. Average Change in Metabolic and Nutritional Variables From Baseline and in Proportions of Patients Taking Diabetes and Cardiovascular Medications (%) at 1, 2, 5, and 8 Years of Follow-up in Surgical vs. Non-surgical Patients**

|                        |                                     | Time since index date (years) |         |                      |         |                      |         |                      |         |
|------------------------|-------------------------------------|-------------------------------|---------|----------------------|---------|----------------------|---------|----------------------|---------|
| Category               | Variable                            | 1                             |         | 2                    |         | 5                    |         | 8                    |         |
|                        |                                     | Estimate (98.8% CI)           | P-value | Estimate (98.8% CI)  | P-value | Estimate (98.8% CI)  | P-value | Estimate (98.8% CI)  | P-value |
| <b>Metabolic</b>       |                                     |                               |         |                      |         |                      |         |                      |         |
|                        | Weight (lbs.)                       | -56.6 (-57.1, -56.1)          | <0.001* | -73.7 (-74.4, -73.0) | <0.001* | -45.2 (-45.9, -44.6) | <0.001* | -44.8 (-45.5, -44.1) | <0.001* |
|                        | Weight (kg)                         | -25.7 (-25.9, -25.4)          | <0.001* | -33.4 (-33.7, -33.1) | <0.001* | -20.5 (-20.8, -20.2) | <0.001* | -20.3 (-20.6, -20.0) | <0.001* |
|                        | HbA1c (%)                           | -1.5 (-1.6, -1.4)             | <0.001* | -1.6 (-1.7, -1.5)    | <0.001* | -1.0 (-1.1, -0.9)    | <0.001* | -1.1 (-1.2, -1.0)    | <0.001* |
| <b>Nutritional</b>     |                                     |                               |         |                      |         |                      |         |                      |         |
|                        | Protein (g/dL)                      | -0.5 (-0.6, -0.5)             | <0.001* | -0.5 (-0.5, -0.5)    | <0.001* | -0.3 (-0.3, -0.3)    | <0.001* | -0.3 (-0.3, -0.3)    | <0.001* |
|                        | Albumin (g/dL)                      | -0.3 (-0.3, -0.3)             | <0.001* | -0.2 (-0.2, -0.1)    | <0.001* | -0.1 (-0.1, -0.1)    | <0.001* | -0.2 (-0.2, -0.1)    | <0.001* |
|                        | Hemoglobin (g/dL)                   | -0.6 (-0.6, -0.5)             | <0.001* | -0.4 (-0.4, -0.3)    | <0.001* | -0.1 (-0.2, 0)       | <0.001* | -0.2 (-0.2, -0.1)    | <0.001* |
|                        | Vitamin D 25 (ug/L)                 | 6.4 (5.0, 7.7)                | <0.001* | 4.1 (2.6, 5.7)       | <0.001* | -0.9 (-2.7, 0.9)     | 0.19    | -1.4 (-4.4, 1.7)     | 0.27    |
| <b>Medications (%)</b> |                                     |                               |         |                      |         |                      |         |                      |         |
|                        | Non-insulin diabetes medications    | -50 (-52.9, -47.1)            | <0.001* | -51.5 (-54.6, -48.3) | <0.001* | -47.4 (-51.9, -42.9) | <0.001* | -37.9 (-45.3, -30.6) | <0.001* |
|                        | Insulin                             | -8.3 (-11.1, -5.4)            | <0.001* | -9.1 (-12.3, -5.9)   | <0.001* | -9.1 (-13.7, -4.6)   | <0.001* | -8.1 (-15.5, -0.7)   | 0.008*  |
|                        | Renin-Angiotensin system inhibitors | -25 (-28.1, -21.9)            | <0.001* | -26.6 (-30.1, -23.1) | <0.001* | -27.5 (-32.3, -22.7) | <0.001* | -26.4 (-34, -18.8)   | <0.001* |
|                        | Other antihypertensive medications  | -2.7 (-5.6, 0.3)              | 0.02    | -3.4 (-6.7, -0.2)    | 0.007*  | -7.7 (-12.1, -3.2)   | <0.001* | -10.6 (-17.6, -3.7)  | <0.001* |
|                        | Lipid-lowering medications          | -16.7 (-19.8, -13.5)          | <0.001* | -21.1 (-24.5, -17.6) | <0.001* | -26.4 (-31.1, -21.7) | <0.001* | -28.3 (-35.8, -20.8) | <0.001* |
|                        | Aspirin                             | -24.5 (-27.1, -21.9)          | <0.001* | -24.4 (-27.4, -21.4) | <0.001* | -25.9 (-30.2, -21.6) | <0.001* | -27 (-34, -20)       | <0.001* |

A four-knot spline interacted with treatment was used for comparing mean changes in metabolic and nutritional variables, and two-sample proportions test was used for medication data at each time point.

98.8% (Bonferroni-corrected) confidence intervals are displayed with each estimate.

**eTable 9. Total Number of Observations and Number of Distinct Patients With Available Measurements After Each Time-Point Following the Index Date for Metabolic and Nutritional Values by Treatment**

| Variable       | Time since index date (years) | Metabolic Surgery      |                       | Nonsurgical Group      |                       |
|----------------|-------------------------------|------------------------|-----------------------|------------------------|-----------------------|
|                |                               | Total no. observations | No. distinct patients | Total no. observations | No. distinct patients |
| HbA1c          | 0                             | 9291                   | 1716                  | 54614                  | 8076                  |
|                | 1                             | 6413                   | 1290                  | 44208                  | 7172                  |
|                | 2                             | 4784                   | 970                   | 34713                  | 6087                  |
|                | 5                             | 1970                   | 494                   | 13192                  | 2917                  |
|                | 8                             | 630                    | 187                   | 3196                   | 851                   |
| Weight         | 0                             | 61646                  | 2278                  | 263913                 | 10718                 |
|                | 1                             | 42497                  | 1790                  | 218461                 | 9733                  |
|                | 2                             | 33071                  | 1434                  | 174631                 | 8436                  |
|                | 5                             | 14586                  | 790                   | 69110                  | 4244                  |
|                | 8                             | 5034                   | 351                   | 17359                  | 1318                  |
| Albumin        | 0                             | 19778                  | 1969                  | 94023                  | 8871                  |
|                | 1                             | 13629                  | 1516                  | 77739                  | 7971                  |
|                | 2                             | 10547                  | 1207                  | 62365                  | 6845                  |
|                | 5                             | 4605                   | 640                   | 24881                  | 3395                  |
|                | 8                             | 1730                   | 265                   | 6416                   | 1035                  |
| Hemoglobin     | 0                             | 30043                  | 2279                  | 127046                 | 8802                  |
|                | 1                             | 18137                  | 1525                  | 105555                 | 7907                  |
|                | 2                             | 14201                  | 1213                  | 84975                  | 6768                  |
|                | 5                             | 6382                   | 649                   | 34037                  | 3382                  |
|                | 8                             | 2293                   | 271                   | 8626                   | 1031                  |
| Protein        | 0                             | 18628                  | 1965                  | 83880                  | 8824                  |
|                | 1                             | 12682                  | 1511                  | 68872                  | 7922                  |
|                | 2                             | 9782                   | 1203                  | 54884                  | 6785                  |
|                | 5                             | 4156                   | 639                   | 21598                  | 3345                  |
|                | 8                             | 1541                   | 262                   | 5651                   | 1013                  |
| Vitamin D (25) | 0                             | 5360                   | 1409                  | 11438                  | 3660                  |
|                | 1                             | 3696                   | 1103                  | 9469                   | 3208                  |
|                | 2                             | 2583                   | 800                   | 7513                   | 2693                  |
|                | 5                             | 1038                   | 373                   | 2942                   | 1241                  |
|                | 8                             | 350                    | 138                   | 771                    | 358                   |

**eTable 10. Sample Size for Computing Proportions of Patients Taking Diabetes and Cardiovascular Drugs Over Time at 0, 1, 2, 5, and 8 Years After the Index Date by Treatment Group**

| <b>Time since index date (years)</b> | <b>Metabolic Surgery</b> | <b>Nonsurgical Group</b> |
|--------------------------------------|--------------------------|--------------------------|
| 0                                    | 2287                     | 11433                    |
| 1                                    | 1820                     | 10309                    |
| 2                                    | 1444                     | 8762                     |
| 5                                    | 784                      | 4235                     |
| 8                                    | 348                      | 1219                     |

**eTable 11. Cumulative Incidence Estimates (%) and 95% CIs for Interventions at 1, 2, 5, and 8 Years After Metabolic Surgery**

| Intervention                                                        | Years since metabolic surgery |                 |                   |                   |
|---------------------------------------------------------------------|-------------------------------|-----------------|-------------------|-------------------|
|                                                                     | 1                             | 2               | 5                 | 8                 |
| Total parenteral nutrition                                          | 1.5 (1, 2.1)                  | 1.8 (1.2, 2.4)  | 2.1 (1.5, 2.8)    | 2.9 (1.9, 3.9)    |
| Endoscopy                                                           | 23.9 (22.1, 25.7)             | 30.1 (28, 32.1) | 44.2 (41.6, 46.8) | 52 (48.7, 55)     |
| Interventional radiology                                            | 2.6 (1.9, 3.2)                | 3.3 (2.5, 4.1)  | 6.8 (5.4, 8.1)    | 10.4 (8.3, 12.4)  |
| Abdominal surgical procedure*                                       | 5.9 (4.9, 6.9)                | 8.1 (6.9, 9.3)  | 12.1 (10.4, 13.7) | 13.8 (11.8, 15.7) |
| Repair of abdominal wall hernia                                     | 2.8 (2.1, 3.6)                | 5.7 (4.6, 6.8)  | 8.7 (7.3, 10.2)   | 11.1 (9.1, 13)    |
| Cholecystectomy                                                     | 1.4 (0.9, 1.9)                | 3.5 (2.6, 4.3)  | 6.5 (5.2, 7.8)    | 9.7 (7.7, 11.7)   |
| Cumulative incidence estimates (%) by the Kaplan-Meier method.      |                               |                 |                   |                   |
| *Not including repair of abdominal wall hernia and cholecystectomy. |                               |                 |                   |                   |

**eFigure 3. Mean Trend Curve of Nutritional Variables of Interest Over Eight Years of Follow-Up in the Surgical and Non-surgical Patients**

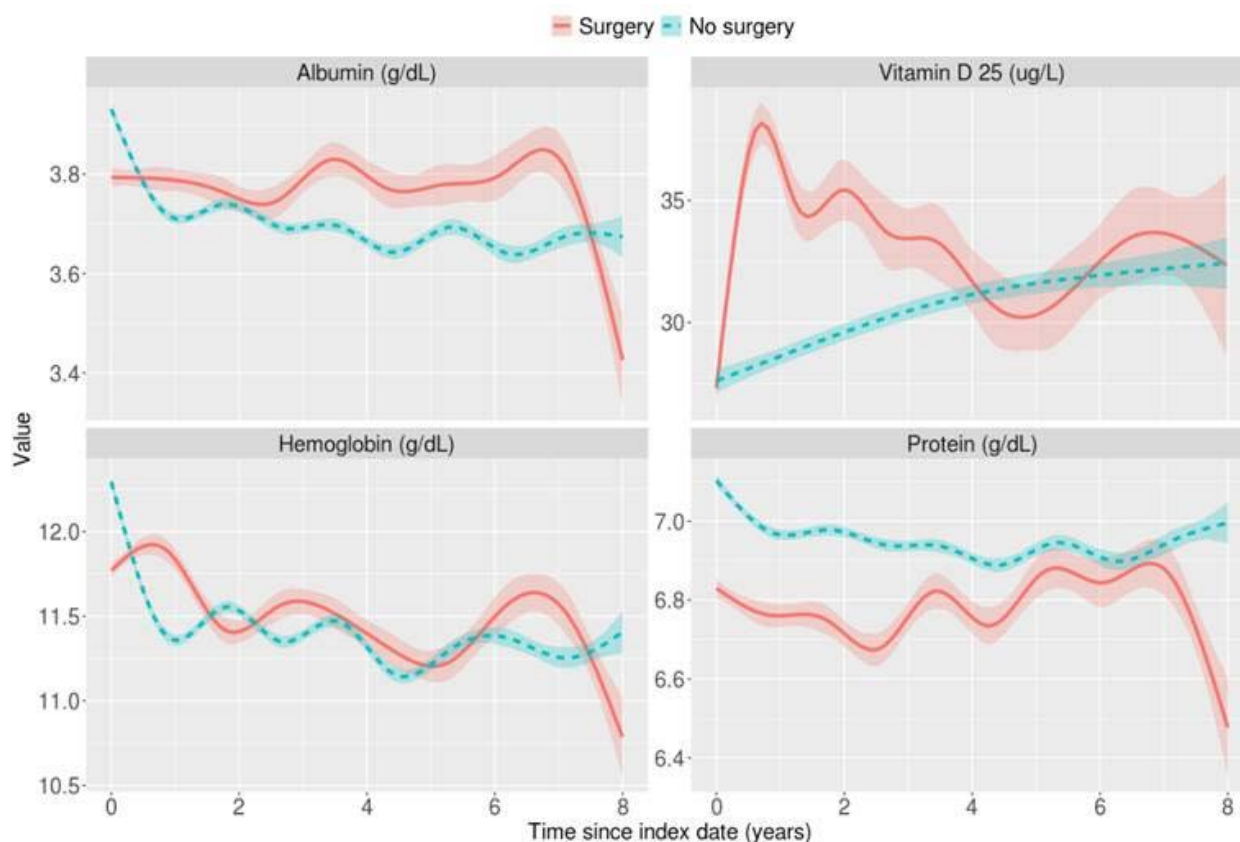

Although nutritional deficiencies have been described after metabolic surgery, longitudinal comparisons in this cohort of patients showed only modest nutritional deficiencies after metabolic surgery compared with nonsurgical patients who had usual care (eTable 8 for estimates).

Routine administration of vitamins and supplements after surgery may explain the observed increase in vitamin D level in surgical patients in the first few years following metabolic surgery.



## SENSITIVITY ANALYSES

### A. Matching and index date sampling

It was of interest to assess the sensitivity of the hazard ratio estimates from the fully-adjusted Cox models to two (2) components of the process used in obtaining non-surgical controls:

- Random-sampling of index dates
- Matching ratio

The surgical index dates were randomly assigned to non-surgical controls five (5) times, and the matching ratio was tested at 1:1, 1:5, and 1:10, thus creating 15 datasets. The full-adjusted Cox models were run on each dataset (for all outcomes) and the hazard ratios and 95% confidence intervals for the treatment variable were obtained for each. The eFigure 4 displays the sampled index date iteration on the x-axis, the hazard ratio estimate on the y-axis, and individual curves for each matching ratio, for each outcome.

As expected, the most amount of variation across the index date sampling datasets comes from a lower matching ratio (1:1) but stabilizes as the matching ratio gets larger. Overall, the differences in hazard ratios comparing the risk of 8 endpoints in surgical patients versus nonsurgical patients appear to be negligible in absolute terms in 15 datasets, and the estimates reported in the manuscript from a single dataset (with 1:5 matching) would be reasonable.

In the examined 15 datasets, HRs for primary and secondary composite endpoints, all-cause mortality, heart failure, and nephropathy were consistently significant. The HRs comparing the risk of incident cerebrovascular disease, coronary artery disease, and atrial fibrillation in surgical patients versus nonsurgical patients were significant in 13, 12, and 11 datasets, respectively.

**eFigure 4. Hazard Ratios and 95% Confidence Intervals for Metabolic Surgery Versus No Surgery From Fully-Adjusted Cox Models for Each Outcome for Five (5) Iterations of Index Date Random Sampling and Three (3) Different Matching Ratios (Total of 15 Datasets)**

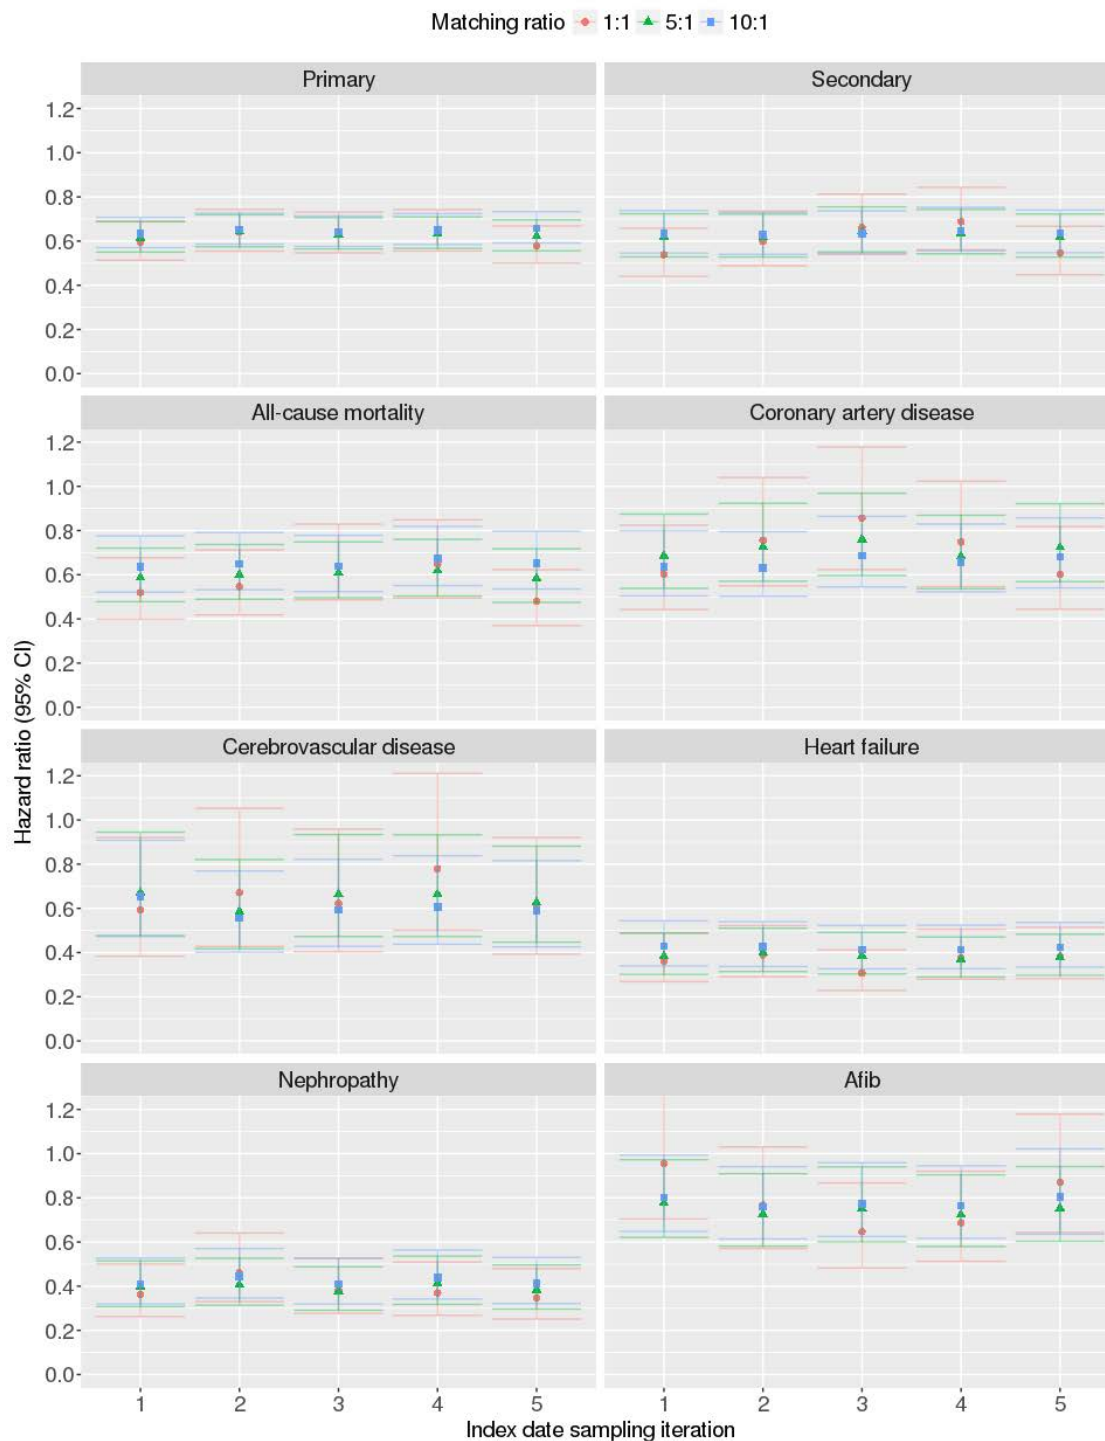

### B. Time-varying hazard ratios

It was of interest to assess estimates of time-varying hazard ratios for surgical vs. non-surgical patients at 2, 5, and 8 years following the index date. The treatment term in the fully-adjusted Cox models above were replaced with a restricted cubic-spline on the observed follow-up time interacted with the treatment group. eTable 4 displays adjusted hazard ratios and 95% confidence intervals at 2, 5, and 8 years after the index date.

**eTable 7. Time-Varying Hazard Ratios and 95% CIs at 2, 5, and 8 Years After the Index Date Comparing Surgical and Non-surgical Patients From a Fully-Adjusted Cox Model for Each Outcome**

| Outcome                 | Years since index date |                   |                   |
|-------------------------|------------------------|-------------------|-------------------|
|                         | 2                      | 5                 | 8                 |
| Primary                 | 0.57 (0.49, 0.65)      | 0.78 (0.66, 0.93) | 0.79 (0.64, 0.97) |
| Secondary               | 0.51 (0.42, 0.63)      | 0.82 (0.65, 1.04) | 0.73 (0.56, 0.95) |
| All-cause mortality     | 0.43 (0.33, 0.57)      | 0.69 (0.50, 0.95) | 0.80 (0.56, 1.15) |
| Heart failure           | 0.31 (0.23, 0.41)      | 0.40 (0.31, 0.53) | 0.52 (0.35, 0.79) |
| Coronary artery disease | 0.52 (0.38, 0.69)      | 1.03 (0.71, 1.51) | 0.99 (0.64, 1.51) |
| Cerebrovascular disease | 0.68 (0.45, 1.04)      | 1.29 (0.77, 2.15) | 0.60 (0.28, 1.25) |
| Nephropathy             | 0.41 (0.30, 0.58)      | 0.40 (0.26, 0.61) | 0.46 (0.30, 0.70) |
| Atrial fibrillation     | 0.68 (0.52, 0.89)      | 0.88 (0.62, 1.25) | 0.65 (0.42, 1.00) |

### C. E-Value

As described by VanderWeele and Ding, the E-value (expressed on the risk ratio scale) represents the minimum strength of association that an unmeasured confounder would need to demonstrate for both the treatment and outcome, conditional on the measured covariates, to fully explain away a specific treatment–outcome association. A small E-value implies little unmeasured confounding would be needed to explain away an effect estimate. It was of interest to estimate the E-values (both for the HR estimates, and for their upper limit of 95% CI) of the 8 major study endpoints (eTable 12).

In the current study, the observed association of metabolic surgery on the primary outcome was HR of 0.61 [95% CI 0.55 to 0.69]. Based on the calculated E-value for the primary end-point, the observed HR of 0.61 could be explained away by an unmeasured confounder that was associated with both the treatment and the outcome by a risk ratio of 2.15-fold each, above and beyond the measured confounders, but weaker confounding could not do so; the confidence interval of HR could be moved to include the null by an unmeasured confounder that was associated with both the treatment and the outcome by a risk ratio of 1.92-fold each, above and beyond the measured confounders, but weaker confounding could not do so.

In other words, the calculated E-value of 2.15 would mean that residual confounding could explain the observed association if there exists an unmeasured covariate having a relative risk association at least as large as 2.15 with both 5-component MACE and with metabolic surgery. Hazard ratios were calculated for 4 well known risk factors associated with the study endpoints (smoking, hypertension, dyslipidemia and insulin use) (eTable 12). E-values well above the HR's for these known risk factors would suggest there is an unmeasured or unknown confounder that has a substantially greater effect on the endpoint than well-established cardiovascular risk factors, which is unlikely.

Examining the E-values for all secondary study endpoints and comparing with the HR estimates of known cardiovascular risk factors for these endpoints (eTable 12) indicates it would be highly unlikely that an unmeasured confounder exists that could explain away the favorable association between metabolic surgery and study endpoints.

**eTable 12. E-Value for the Effect of Metabolic Surgery on Each Outcome (and its Upper Limit of 95% CI) in Fully-Adjusted Cox Models**

| Outcome                        | E-value for HR estimate | E-value for upper limit of 95% CI | Variable       | Level             | HR (95% CI)*      |
|--------------------------------|-------------------------|-----------------------------------|----------------|-------------------|-------------------|
| <b>Primary composite</b>       | 2.15                    | 1.92                              | Smoking status | Current vs. Never | 1.25 (1.13, 1.39) |
|                                |                         |                                   |                | Quit vs. Never    | 1.13 (1.05, 1.21) |
|                                |                         |                                   | Hypertension   | Yes vs. No        | 1.05 (0.95, 1.16) |
|                                |                         |                                   | Dyslipidemia   | No vs. Yes        | 1.06 (0.98, 1.16) |
|                                |                         |                                   | Insulin Use    | Yes vs. No        | 1.33 (1.23, 1.43) |
| <b>Secondary composite</b>     | 2.62                    | 2.11                              | Smoking status | Current vs. Never | 1.37 (1.19, 1.58) |
|                                |                         |                                   |                | Quit vs. Never    | 1.14 (1.03, 1.26) |
|                                |                         |                                   | Hypertension   | No vs. Yes        | 1.04 (0.91, 1.19) |
|                                |                         |                                   | Dyslipidemia   | No vs. Yes        | 1.14 (1.02, 1.29) |
|                                |                         |                                   | Insulin Use    | Yes vs. No        | 1.43 (1.3, 1.58)  |
| <b>All-cause mortality</b>     | 2.81                    | 2.13                              | Smoking status | Current vs. Never | 1.51 (1.25, 1.82) |
|                                |                         |                                   |                | Quit vs. Never    | 1.12 (0.98, 1.27) |
|                                |                         |                                   | Hypertension   | No vs. Yes        | 1.14 (0.97, 1.35) |
|                                |                         |                                   | Dyslipidemia   | No vs. Yes        | 1.3 (1.12, 1.5)   |
|                                |                         |                                   | Insulin Use    | Yes vs. No        | 1.73 (1.53, 1.97) |
| <b>Heart Failure</b>           | 4.69                    | 3.52                              | Smoking status | Current vs. Never | 1.32 (1.09, 1.6)  |
|                                |                         |                                   |                | Quit vs. Never    | 1.23 (1.07, 1.41) |
|                                |                         |                                   | Hypertension   | Yes vs. No        | 1.11 (0.93, 1.33) |
|                                |                         |                                   | Dyslipidemia   | No vs. Yes        | 1.27 (1.09, 1.48) |
|                                |                         |                                   | Insulin Use    | Yes vs. No        | 1.47 (1.29, 1.67) |
| <b>Coronary artery disease</b> | 2.27                    | 1.55                              | Smoking status | Current vs. Never | 1.51 (1.2, 1.89)  |
|                                |                         |                                   |                | Quit vs. Never    | 1.29 (1.1, 1.51)  |
|                                |                         |                                   | Hypertension   | No vs. Yes        | 1.04 (0.83, 1.29) |
|                                |                         |                                   | Dyslipidemia   | Yes vs. No        | 1.16 (0.96, 1.41) |
|                                |                         |                                   | Insulin Use    | Yes vs. No        | 1.14 (0.97, 1.34) |
| <b>Cerebrovascular disease</b> | 2.35                    | 1.31                              | Smoking status | Current vs. Never | 1.33 (0.95, 1.86) |
|                                |                         |                                   |                | Quit vs. Never    | 1.3 (1.04, 1.62)  |
|                                |                         |                                   | Hypertension   | Yes vs. No        | 1.44 (1.04, 1.98) |
|                                |                         |                                   | Dyslipidemia   | No vs. Yes        | 1.08 (0.83, 1.4)  |
|                                |                         |                                   | Insulin Use    | Yes vs. No        | 1.17 (0.94, 1.47) |
| <b>Nephropathy</b>             | 4.46                    | 3.29                              | Smoking status | Never vs. Current | 1.23 (0.96, 1.58) |
|                                |                         |                                   |                | Quit vs. Never    | 1.03 (0.88, 1.19) |
|                                |                         |                                   | Hypertension   | Yes vs. No        | 1.36 (1.09, 1.69) |
|                                |                         |                                   | Dyslipidemia   | No vs. Yes        | 1.17 (0.97, 1.4)  |
|                                |                         |                                   | Insulin Use    | Yes vs. No        | 1.29 (1.11, 1.5)  |
| <b>Atrial Fibrillation</b>     | 1.9                     | 1.21                              | Smoking status | Current vs. Never | 1.07 (0.85, 1.35) |
|                                |                         |                                   |                | Quit vs. Never    | 1.16 (1, 1.34)    |
|                                |                         |                                   | Hypertension   | Yes vs. No        | 1.1 (0.9, 1.35)   |
|                                |                         |                                   | Dyslipidemia   | No vs. Yes        | 1.27 (1.07, 1.51) |
|                                |                         |                                   | Insulin Use    | Yes vs. No        | 1.06 (0.91, 1.22) |

\* HR's (95% CI's) for known cardiovascular risk factors for each outcome are shown for comparison of magnitude.
